# Supplementary material for: Synergistic Suppression of Inflammation by AZA, Rice Bran Oil, and AntimiR-466l through IL-6/NF-κβ/TLR4 Pathways in Mice Model of Ulcerative Colitis
Source: Research Square preprint supplement (doi:10.21203/rs.3.rs-7845870/v1), 2025-11-13
Supplement: Supplementary file 1 [file 5746e3dc0f3f6dcefe3fa5be.docx]

Table S1. Ct values of IL6, IL10, TLR4, NF-κB, miR-466L, ACTB, and U6 genes obtained by real-time PCR in the UC group.

| IL6 Ct Values | | | | | IL10 Ct Values | | | | |
| --- | --- | --- | --- | --- | --- | --- | --- | --- | --- |
| Number | Ct1 | Ct2 | Ct3 | Ct Values ​​Average | Ct1 | Ct2 | Ct3 | Ct Values ​​Average | |
| UC25 | 19,500 | 21,800 | 21,740 | 21,01 | 23,5 | 25,8 | 25,73 | 25,73 | |
| UC26 | 18,820 | 21,120 | 21,060 | 20,33 | 23,94 | 26,24 | 26,17 | 26,17 | |
| UC27 | 19,310 | 21,610 | 21,550 | 20,82 | 23,85 | 26,15 | 26,08 | 26,08 | |
| UC28 | 19,110 | 21,410 | 21,350 | 20,62 | 24,09 | 26,39 | 26,32 | 26,32 | |
| UC29 | 19,800 | 22,100 | 22,040 | 21,31 | 25,28 | 27,58 | 27,51 | 27,51 | |
| NF-ĸβ Ct Values | | | | | TLR4 Ct Values | | | | |
| Number | Ct1 | Ct2 | Ct3 | Ct Values ​​Average | Ct1 | Ct2 | Ct3 | Ct Values ​​Average | |
| UC25 | 20,7 | 18,5 | 20,77 | 19,99 | 23,04 | 20,84 | 23,1 | 23,04 | |
| UC26 | 22,27 | 20,07 | 22,34 | 21,56 | 22,7 | 20,5 | 22,76 | 22,70 | |
| UC27 | 21,71 | 19,51 | 21,78 | 21,00 | 23,35 | 21,15 | 23,41 | 23,35 | |
| UC28 | 21,8 | 19,6 | 21,93 | 21,11 | 22,05 | 19,85 | 22,11 | 22,05 | |
| UC29 | 22,53 | 20,33 | 22,66 | 21,84 | 22,57 | 20,37 | 22,63 | 22,57 | |
| miR-466l Ct Values | | | | | ACTB Ct Values | | | | |
| Number | Ct1 | Ct2 | Ct3 | Ct Values ​​Average | Ct1 | Ct2 | Ct3 | Ct Values ​​Average | |
| UC25 | 18,39 | 20,69 | 20,65 | 19,91 | 23,884 | 21,684 | 24,010 | 23,88 | |
| UC26 | 19,08 | 21,38 | 21,34 | 20,60 | 26,187 | 23,987 | 26,320 | 26,19 | |
| UC27 | 19,48 | 21,78 | 21,74 | 21,00 | 22,089 | 19,889 | 22,220 | 22,09 | |
| UC28 | 19,91 | 22,21 | 22,17 | 21,43 | 24,291 | 22,091 | 24,420 | 24,29 | |
| UC29 | 20,37 | 22,67 | 22,63 | 21,89 | 24,838 | 22,638 | 24,970 | 24,84 | |
| U6 Ct Values | | | | | | | | | |
| Number | Ct1 | Ct2 | Ct3 | Ct Values ​​Average | Number | Ct1 | Ct2 | Ct3 | Ct Values ​​Average |
| UC25 | 23,78 | 26,08 | 26,03 | 25,30 | UC28 | 19,89085 | 22,19085 | 22,14 | 21,41 |
| UC26 | 21,79 | 24,09 | 24,04 | 23,30 | UC29 | 20,43811 | 22,73811 | 22,69 | 21,96 |
| UC27 | 17,69 | 19,99 | 19,94 | 19,21 |  |  |  |  |  |

| IL6 Ct Values | | | | | IL10 Ct Values | | | | |
| --- | --- | --- | --- | --- | --- | --- | --- | --- | --- |
|  | Ct1 | Ct2 | Ct3 | Ct Values ​​Average | Ct1 | Ct2 | Ct3 | Ct Values ​​Average | |
| Control | 22 | 24,3 | 24,24 | 23,51 | 26,49 | 24,29 | 26,62 | 26,49 | |
| Control | 22,17 | 24,47 | 24,41 | 23,68 | 23,19 | 20,99 | 23,32 | 23,19 | |
| Control | 21,35 | 23,65 | 23,59 | 22,86 | 22,66 | 20,46 | 22,79 | 22,66 | |
| Control | 21,63 | 23,93 | 23,87 | 23,14 | 24,49 | 22,29 | 24,62 | 24,49 | |
| NF-ĸβ Ct Values | | | | | TLR4 Ct Values | | | | |
| Number | Ct1 | Ct2 | Ct3 | Ct Values ​​Average | Ct1 | Ct2 | Ct3 | Ct Values ​​Average | |
| Control | 22,68 | 20,48 | 22,81 | 21,99 | 28 | 25,8 | 28,06 | 28,00 | |
| Control | 22,73 | 20,53 | 22,86 | 22,04 | 27,3 | 25,1 | 27,36 | 27,30 | |
| Control | 23,56 | 21,36 | 23,69 | 22,87 | 26,89 | 24,69 | 26,95 | 26,89 | |
| Control | 23,62 | 21,42 | 23,75 | 22,93 | 27,43 | 25,23 | 27,49 | 27,43 | |
| miR-466l Ct Values | | | | | ACTB Ct Values | | | | |
| Number | Ct1 | Ct2 | Ct3 | Ct Values ​​Average | Ct1 | Ct2 | Ct3 | Ct Values ​​Average | |
| Control | 22,26 | 24,56 | 24,52 | 23,78 | 26,49 | 24,29 | 26,62 | 26,49 | |
| Control | 22,48 | 24,78 | 24,74 | 24,00 | 23,19 | 20,99 | 23,32 | 23,19 | |
| Control | 22,33 | 24,63 | 24,59 | 23,85 | 22,66 | 20,46 | 22,79 | 22,66 | |
| Control | 22,63 | 24,93 | 24,89 | 24,15 | 24,49 | 22,29 | 24,62 | 24,49 | |
| U6 Ct Values | | | | | | | | | |
| Number | Ct1 | Ct2 | Ct3 | Ct Values ​​Average | Number | Ct1 | Ct2 | Ct3 | Ct Values ​​Average |
| Control | 22,65775 | 24,95775 | 24,91 | 24,18 | Control | 26,49237 | 28,79237 | 28,74 | 28,01 |
| Control | 24,49008 | 26,79008 | 26,74 | 26,01 | Control | 23,18848 | 25,48848 | 25,44 | 24,71 |

Table S2. Ct values of IL6, IL10, TLR4, NF-κB, miR-466L, ACTB, and U6 genes obtained by real-time PCR in the control group.

Table S3. Ct values of IL6, IL10, TLR4, NF-κB, miR-466L, ACTB, and U6 genes obtained by real-time PCR in the UC + AZA group.

| IL6 Ct Values | | | | | IL10 Ct Values | | | | |
| --- | --- | --- | --- | --- | --- | --- | --- | --- | --- |
| Number | Ct1 | Ct2 | Ct3 | Ct Values ​​Average | Ct1 | Ct2 | Ct3 | Ct Values ​​Average | |
| UC7 | 21,370 | 23,670 | 23,610 | 22,88 | 22,82 | 25,12 | 25,05 | 25,05 | |
| UC8 | 22,100 | 24,400 | 24,340 | 23,61 | 23,64 | 25,94 | 25,87 | 25,87 | |
| UC9 | 22,720 | 25,020 | 24,960 | 24,23 | 23,85 | 26,15 | 26,08 | 26,08 | |
| UC10 | 21,930 | 24,230 | 24,170 | 23,44 | 23,99 | 26,29 | 26,22 | 26,22 | |
| UC11 | 22,370 | 24,670 | 24,610 | 23,88 | 25,28 | 27,58 | 27,51 | 27,51 | |
| UC12 | 21,870 | 24,170 | 24,110 | 23,38 | 23 | 25,3 | 25,23 | 25,23 | |
| NF-ĸβ Ct Values | | | | | TLR4 Ct Values | | | | |
| Number | Ct1 | Ct2 | Ct3 | Ct Values ​​Average | Ct1 | Ct2 | Ct3 | Ct Values ​​Average | |
| UC7 | 24,83 | 22,63 | 24,9 | 24,12 | 25,25 | 23,05 | 25,31 | 25,25 | |
| UC8 | 23,87 | 21,67 | 23,94 | 23,16 | 25,7 | 23,5 | 25,76 | 25,70 | |
| UC9 | 23,71 | 21,51 | 23,78 | 23,00 | 24,79 | 22,59 | 24,85 | 24,79 | |
| UC10 | 24,51 | 22,31 | 24,58 | 23,80 | 26,57 | 24,37 | 26,63 | 26,57 | |
| UC11 | 25,03 | 22,83 | 25,1 | 24,32 | 25,59 | 23,39 | 25,65 | 25,59 | |
| UC12 | 24,63 | 22,43 | 24,7 | 23,92 | 27,13 | 24,93 | 27,19 | 27,13 | |
| miR-466l Ct Values | | | | | ACTB Ct Values | | | | |
| Number | Ct1 | Ct2 | Ct3 | Ct Values ​​Average | Ct1 | Ct2 | Ct3 | Ct Values ​​Average | |
| UC7 | 19,69 | 21,99 | 21,95 | 21,21 | 21,62 | 19,42 | 21,75 | 21,62 | |
| UC8 | 21,38 | 23,68 | 23,64 | 22,90 | 26,75 | 24,55 | 26,88 | 26,75 | |
| UC9 | 21,41 | 23,71 | 23,67 | 22,93 | 24,90 | 22,70 | 25,03 | 24,90 | |
| UC10 | 21,61 | 23,91 | 23,87 | 23,13 | 25,65 | 23,45 | 25,78 | 25,65 | |
| UC11 | 22,27 | 24,57 | 24,53 | 23,79 | 21,62 | 19,42 | 21,75 | 21,62 | |
| UC12 | 20,37 | 22,67 | 22,63 | 21,89 | 27,48 | 25,28 | 27,61 | 27,48 | |
| U6 Ct Values | | | | | | | | | |
| Number | Ct1 | Ct2 | Ct3 | Ct Values ​​Average | Number | Ct1 | Ct2 | Ct3 | Ct Values ​​Average |
| UC7 | 21,52 | 23,82 | 23,77 | 23,04 | UC10 | 25,54771 | 27,84771 | 27,8 | 27,07 |
| UC8 | 26,65 | 28,95 | 28,9 | 28,17 | UC11 | 21,52273 | 23,82273 | 23,77 | 23,04 |
| UC9 | 24,8 | 27,1 | 27,05 | 26,32 | UC12 | 27,38057 | 29,68057 | 29,63 | 28,90 |

Table S4. Ct values of IL6, IL10, TLR4, NF-κB, miR-466L, ACTB, and U6 genes obtained by real-time PCR in the UC+RBO group.

| IL6 Ct Values | | | | | IL10 Ct Values | | | | |
| --- | --- | --- | --- | --- | --- | --- | --- | --- | --- |
| Number | Ct1 | Ct2 | Ct3 | Ct Values ​​Average | Ct1 | Ct2 | Ct3 | Ct Values ​​Average | |
| UC1 | 24,50 | 26,80 | 26,74 | 26,01 | 23,00 | 25,30 | 25,23 | 25,23 | |
| UC2 | 21,25 | 23,55 | 23,49 | 22,76 | 23,50 | 25,80 | 25,73 | 25,73 | |
| UC3 | 22,04 | 24,34 | 24,28 | 23,55 | 23,48 | 25,78 | 25,71 | 25,71 | |
| UC4 | 20,58 | 22,88 | 22,82 | 22,09 | 23,15 | 25,45 | 25,38 | 25,38 | |
| UC5 | 19,64 | 21,94 | 21,88 | 21,15 | 23,64 | 25,94 | 25,87 | 25,87 | |
| UC6 | 19,54 | 21,84 | 21,78 | 21,05 | 23,55 | 25,85 | 25,78 | 25,78 | |
| NF-ĸβ Ct Values | | | | | TLR4 Ct Values | | | | |
| Number | Ct1 | Ct2 | Ct3 | Ct Values ​​Average | Ct1 | Ct2 | Ct3 | Ct Values ​​Average | |
| UC1 | 23,70 | 21,50 | 23,77 | 22,99 | 24,46 | 22,26 | 24,52 | 24,46 | |
| UC2 | 23,27 | 21,07 | 23,34 | 22,56 | 24,70 | 22,50 | 24,76 | 24,70 | |
| UC3 | 23,71 | 21,51 | 23,78 | 23,00 | 25,56 | 23,36 | 25,62 | 25,56 | |
| UC4 | 24,51 | 22,31 | 24,58 | 23,80 | 24,68 | 22,48 | 24,74 | 24,68 | |
| UC5 | 24,83 | 22,63 | 24,90 | 24,12 | 25,25 | 23,05 | 25,31 | 25,25 | |
| UC6 | 25,23 | 23,03 | 25,30 | 24,52 | 25,54 | 23,34 | 25,60 | 25,54 | |
| miR-466l Ct Values | | | | | ACTB Ct Values | | | | |
| Number | Ct1 | Ct2 | Ct3 | Ct Values ​​Average | Ct1 | Ct2 | Ct3 | Ct Values ​​Average | |
| UC1 | 20,44 | 22,74 | 22,70 | 21,96 | 23,31 | 21,11 | 23,44 | 23,31 | |
| UC2 | 20,61 | 22,91 | 22,87 | 22,13 | 27,35 | 25,15 | 27,48 | 27,35 | |
| UC3 | 19,68 | 21,98 | 21,94 | 21,20 | 25,82 | 23,62 | 25,95 | 25,82 | |
| UC4 | 20,23 | 22,53 | 22,49 | 21,75 | 24,88 | 22,68 | 25,01 | 24,88 | |
| UC5 | 20,77 | 23,07 | 23,03 | 22,29 | 21,78 | 19,58 | 21,91 | 21,78 | |
| UC6 | 18,15 | 20,45 | 20,41 | 19,67 | 21,78 | 19,58 | 21,91 | 21,78 | |
| U6 Ct Values | | | | | | | | | |
| Number | Ct1 | Ct2 | Ct3 | Ct Values ​​Average | Number | Ct1 | Ct2 | Ct3 | Ct Values ​​Average |
| UC1 | 23,21 | 25,51 | 25,46 | 24,73 | UC4 | 24,78 | 27,08 | 27,03 | 26,30 |
| UC2 | 27,25 | 29,55 | 29,50 | 28,76 | UC5 | 21,68 | 23,98 | 23,93 | 23,20 |
| UC3 | 25,72 | 28,02 | 27,97 | 27,23 | UC6 | 21,68 | 23,98 | 23,93 | 23,20 |

Table S5. Ct values of IL6, IL10, TLR4, NF-κB, miR-466L, ACTB, and U6 genes obtained by real-time PCR in the UC+AZA+RBO group.

| IL6 Ct Values | | | | | IL10 Ct Values | | | | |
| --- | --- | --- | --- | --- | --- | --- | --- | --- | --- |
| Number | Ct1 | Ct2 | Ct3 | Ct Values ​​Average | Ct1 | Ct2 | Ct3 | Ct Values ​​Average | |
| UC13 | 22,580 | 24,880 | 24,820 | 24,09 | 23,38 | 25,68 | 25,61 | 25,61 | |
| UC14 | 22,380 | 24,680 | 24,620 | 23,89 | 22,98 | 25,28 | 25,21 | 25,21 | |
| UC15 | 23,390 | 25,690 | 25,630 | 24,90 | 22,42 | 24,72 | 24,65 | 24,65 | |
| UC16 | 22,620 | 24,920 | 24,860 | 24,13 | 21,93 | 24,23 | 24,16 | 24,16 | |
| UC17 | 22,500 | 24,800 | 24,740 | 24,01 | 23,24 | 25,54 | 25,47 | 25,47 | |
| UC18 | 21,820 | 24,120 | 24,060 | 23,33 | 22,19 | 24,49 | 24,42 | 24,42 | |
| NF-ĸβ Ct Values | | | | | TLR4 Ct Values | | | | |
| Number | Ct1 | Ct2 | Ct3 | Ct Values ​​Average | Ct1 | Ct2 | Ct3 | Ct Values ​​Average | |
| UC13 | 25,63 | 23,43 | 25,7 | 24,92 | 26,59 | 24,39 | 26,65 | 26,59 | |
| UC14 | 25,87 | 23,67 | 25,94 | 25,16 | 26,7 | 24,5 | 26,76 | 26,70 | |
| UC15 | 24,81 | 22,61 | 24,88 | 24,10 | 27,57 | 25,37 | 27,63 | 27,57 | |
| UC16 | 24,42 | 22,22 | 24,49 | 23,71 | 27,73 | 25,53 | 27,79 | 27,73 | |
| UC17 | 25,23 | 23,03 | 25,3 | 24,52 | 28,24 | 26,04 | 28,3 | 28,24 | |
| UC18 | 26,23 | 24,03 | 26,3 | 25,52 | 27,62 | 25,42 | 27,68 | 27,62 | |
| miR-466l Ct Values | | | | | ACTB Ct Values | | | | |
| Number | Ct1 | Ct2 | Ct3 | Ct Values ​​Average | Ct1 | Ct2 | Ct3 | Ct Values ​​Average | |
| UC13 | 22,35 | 24,65 | 24,61 | 23,87 | 26,518 | 24,318 | 26,650 | 26,52 | |
| UC14 | 23,18 | 25,48 | 25,44 | 24,70 | 22,178 | 19,978 | 22,310 | 22,18 | |
| UC15 | 22,41 | 24,71 | 24,67 | 23,93 | 21,964 | 19,764 | 22,090 | 21,96 | |
| UC16 | 22,41 | 24,71 | 24,67 | 23,93 | 21,975 | 19,775 | 22,110 | 21,98 | |
| UC17 | 22,27 | 24,57 | 24,53 | 23,79 | 22,821 | 20,621 | 22,950 | 22,82 | |
| UC18 | 23,37 | 25,67 | 25,63 | 24,89 | 24,364 | 22,164 | 24,490 | 24,36 | |
| U6 Ct Values | | | | | | | | | |
| Number | Ct1 | Ct2 | Ct3 | Ct Values ​​Average | Number | Ct1 | Ct2 | Ct3 | Ct Values ​​Average |
| UC13 | 26,42 | 28,72 | 28,67 | 27,94 | UC16 | 21,87504 | 24,17504 | 24,13 | 23,39 |
| UC14 | 22,08 | 24,38 | 24,33 | 23,60 | UC17 | 22,7209 | 25,0209 | 24,97 | 24,24 |
| UC15 | 21,86 | 24,16 | 24,11 | 23,38 | UC18 | 24,2645 | 26,5645 | 26,51 | 25,78 |

Table S6. Ct values of IL6, IL10, TLR4, NF-κB, miR-466L, ACTB, and U6 genes obtained by real-time PCR in the UC+AntimiR-466l group.

| IL6 Ct Values | | | | | IL10 Ct Values | | | | |
| --- | --- | --- | --- | --- | --- | --- | --- | --- | --- |
| Number | Ct1 | Ct2 | Ct3 | Ct Values ​​Average | Ct1 | Ct2 | Ct3 | Ct Values ​​Average | |
| UC19 | 20,670 | 22,970 | 22,910 | 22,18 | 21,08 | 23,38 | 23,31 | 23,31 | |
| UC20 | 19,620 | 21,920 | 21,860 | 21,13 | 19,54 | 21,84 | 21,77 | 21,77 | |
| UC21 | 20,820 | 23,120 | 23,060 | 22,33 | 20,26 | 22,56 | 22,49 | 22,49 | |
| UC22 | 23,340 | 25,640 | 25,580 | 24,85 | 20,69 | 22,99 | 22,92 | 22,92 | |
| UC23 | 21,700 | 24,000 | 23,940 | 23,21 | 20,82 | 23,12 | 23,05 | 23,05 | |
| UC24 | 21,030 | 23,330 | 23,270 | 22,54 | 20,3 | 22,6 | 22,53 | 22,53 | |
| NF-ĸβ Ct Values | | | | | TLR4 Ct Values | | | | |
| Number | Ct1 | Ct2 | Ct3 | Ct Values ​​Average | Ct1 | Ct2 | Ct3 | Ct Values ​​Average | |
| UC19 | 23,93 | 21,73 | 24 | 23,22 | 25,03 | 22,83 | 25,09 | 25,03 | |
| UC20 | 24,8 | 22,6 | 24,87 | 24,09 | 24,41 | 22,21 | 24,47 | 24,41 | |
| UC21 | 23,85 | 21,65 | 23,92 | 23,14 | 24,15 | 21,95 | 24,21 | 24,15 | |
| UC22 | 23,75 | 21,55 | 23,82 | 23,04 | 25,35 | 23,15 | 25,41 | 25,35 | |
| UC23 | 25,35 | 23,15 | 25,42 | 24,64 | 23,89 | 21,69 | 23,95 | 23,89 | |
| UC24 | 23,81 | 21,61 | 23,88 | 23,10 | 23,91 | 21,71 | 23,97 | 23,91 | |
| miR-466l Ct Values | | | | | ACTB Ct Values | | | | |
| Number | Ct1 | Ct2 | Ct3 | Ct Values ​​Average | Ct1 | Ct2 | Ct3 | Ct Values ​​Average | |
| UC19 | 25,27 | 27,57 | 27,53 | 26,79 | 23,715 | 21,515 | 23,840 | 23,71 | |
| UC20 | 25,51 | 27,81 | 27,77 | 27,03 | 22,730 | 20,530 | 22,860 | 22,73 | |
| UC21 | 25,84 | 28,14 | 28,1 | 27,36 | 24,974 | 22,774 | 25,100 | 24,97 | |
| UC22 | 26,48 | 28,78 | 28,74 | 28,00 | 21,668 | 19,468 | 21,800 | 21,67 | |
| UC23 | 24,85 | 27,15 | 27,11 | 26,37 | 22,736 | 20,536 | 22,870 | 22,74 | |
| UC24 | 26,01 | 28,31 | 28,27 | 27,53 | 23,256 | 21,056 | 23,390 | 23,26 | |
| U6 Ct Values | | | | | | | | | |
| Number | Ct1 | Ct2 | Ct3 | Ct Values ​​Average | Number | Ct1 | Ct2 | Ct3 | Ct Values ​​Average |
| UC19 | 23,61 | 25,91 | 25,86 | 25,13 | UC22 | 21,56766 | 23,86766 | 23,82 | 23,09 |
| UC20 | 22,63 | 24,93 | 24,88 | 24,15 | UC23 | 22,63622 | 24,93622 | 24,89 | 24,15 |
| UC21 | 24,87 | 27,17 | 27,12 | 26,39 | UC24 | 23,15574 | 25,45574 | 25,41 | 24,67 |

Table S7. Ct values of TLR4, NF-κB, miR-466L, ACTB, and U6 genes obtained by real-time PCR from colon tissues of the UC, UC+AZA+RBO and UC+AntimiR466l group.

| NF-ĸβ Ct Values | | | | |
| --- | --- | --- | --- | --- |
| Group | Ct1 | Ct2 | Ct3 | Ct Values ​​Average |
| UC+AZA+RBO | 32,251 | 31,456 | 31,313 | 31,67 |
| UC+AntimiR-466l | 31,009 | 31,28 | 32,28 | 31,52 |
| UC | 21,935 | 21,945 | 21,944 | 21,94 |
| TLR4 Ct Values | | | | |
| Group | Ct1 | Ct2 | Ct3 | Ct Values ​​Average |
| UC+AZA+RBO | 28,473 | 26,438 | 28,458 | 28,46 |
| UC+AntimiR-466l | 27,477 | 25,457 | 27,729 | 27,48 |
| UC | 18,149 | 16,538 | 18,723 | 18,15 |
| ACTB Ct Values | | | | |
| Group | Ct1 | Ct2 | Ct3 | Ct Values ​​Average |
| UC+AZA+RBO | 25,094 | 24,739 | 24,05 | 24,74 |
| UC+AntimiR-466l | 18,969 | 18,659 | 18,472 | 18,66 |
| UC | 21,571 | 21,615 | 20,865 | 21,57 |
